# Supplementary material
Source: PubMed Central journal article supplement (PMC2129172)

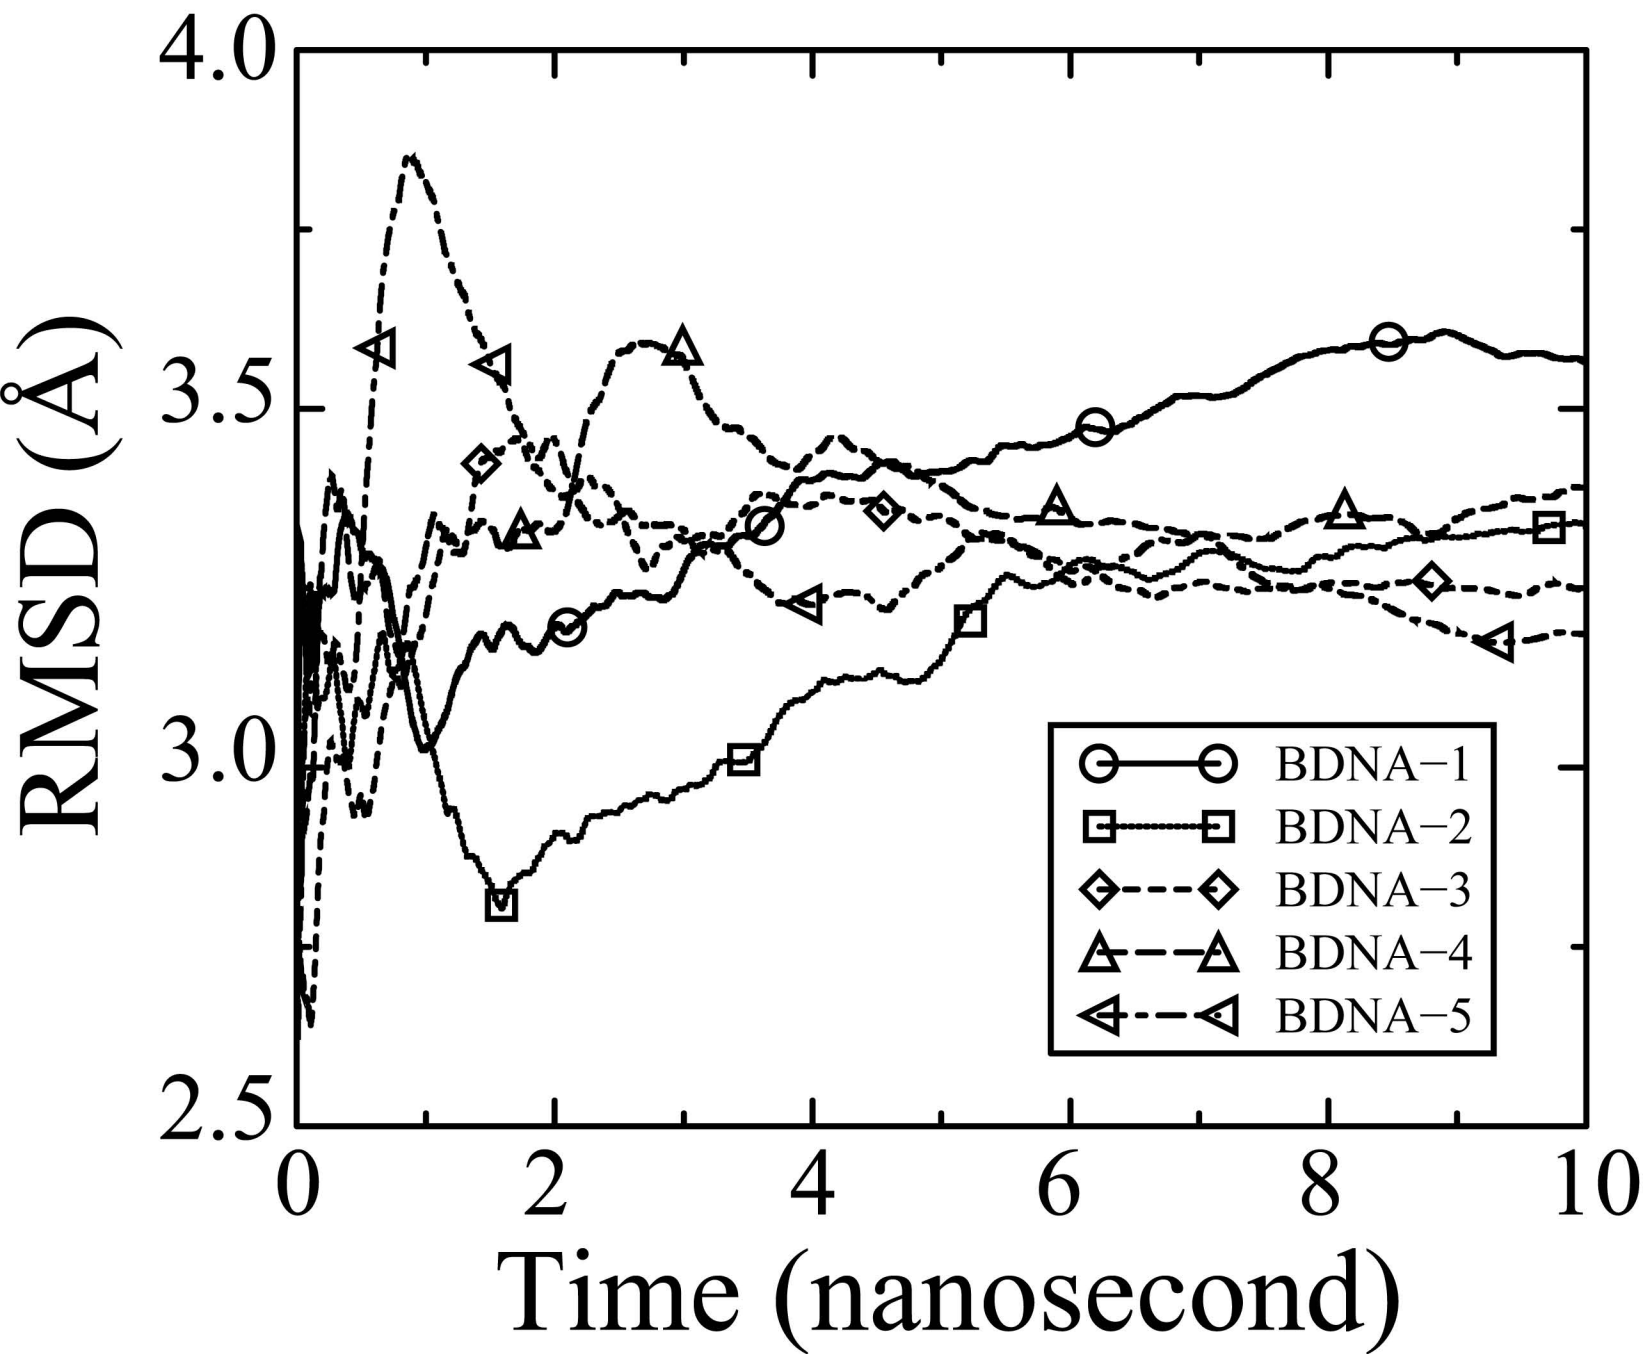

Supplement: NIHMS32970-supplement-01.pdf [file NIHMS32970-supplement-01.pdf]

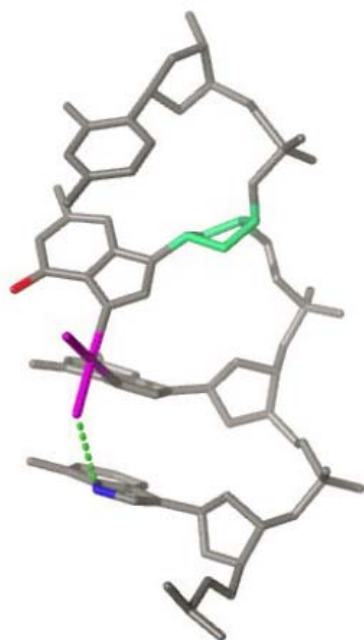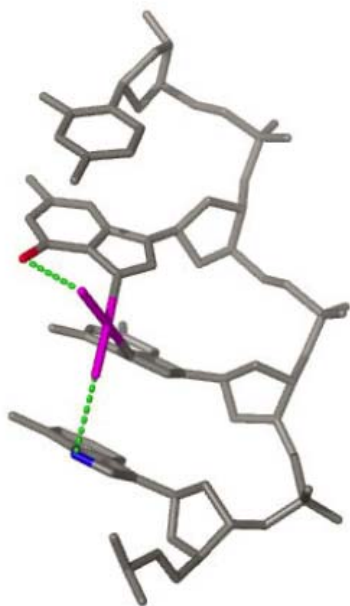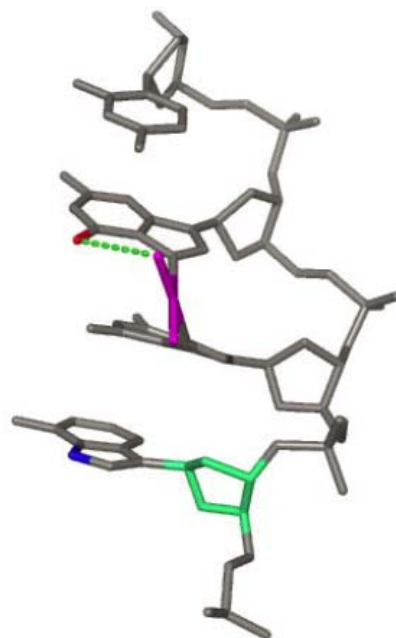

Supplement: NIHMS32970-supplement-02.pdf [file NIHMS32970-supplement-02.pdf]

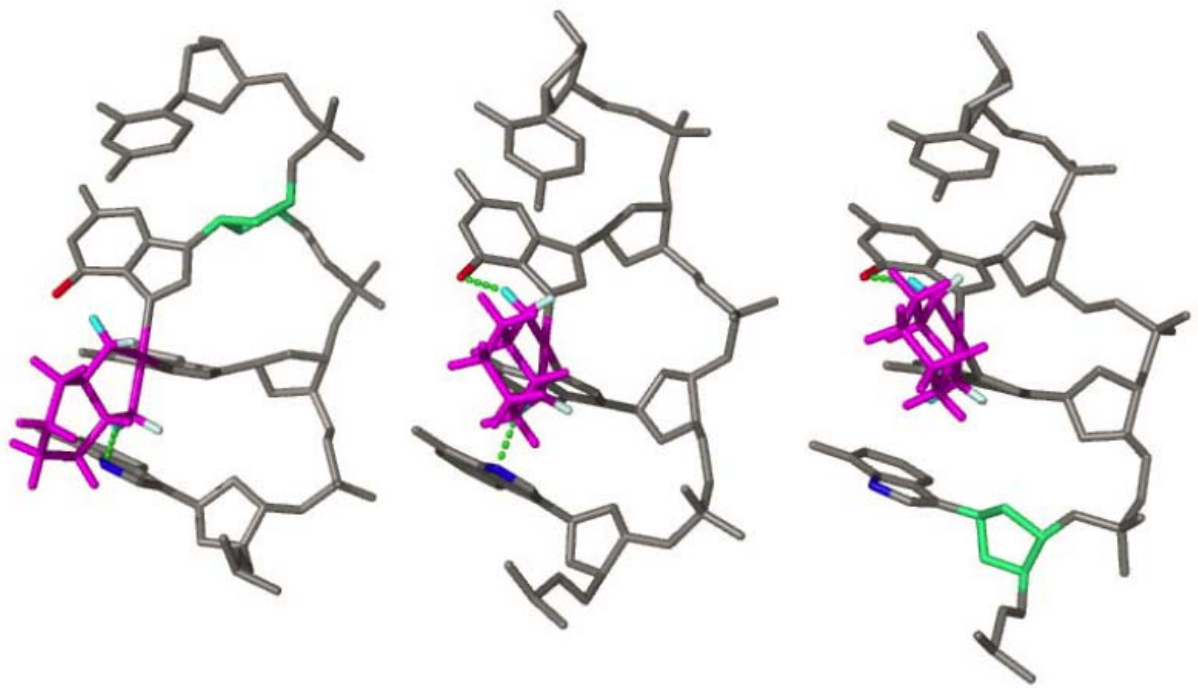

Supplement: NIHMS32970-supplement-03.pdf [file NIHMS32970-supplement-03.pdf]

CP-SRY

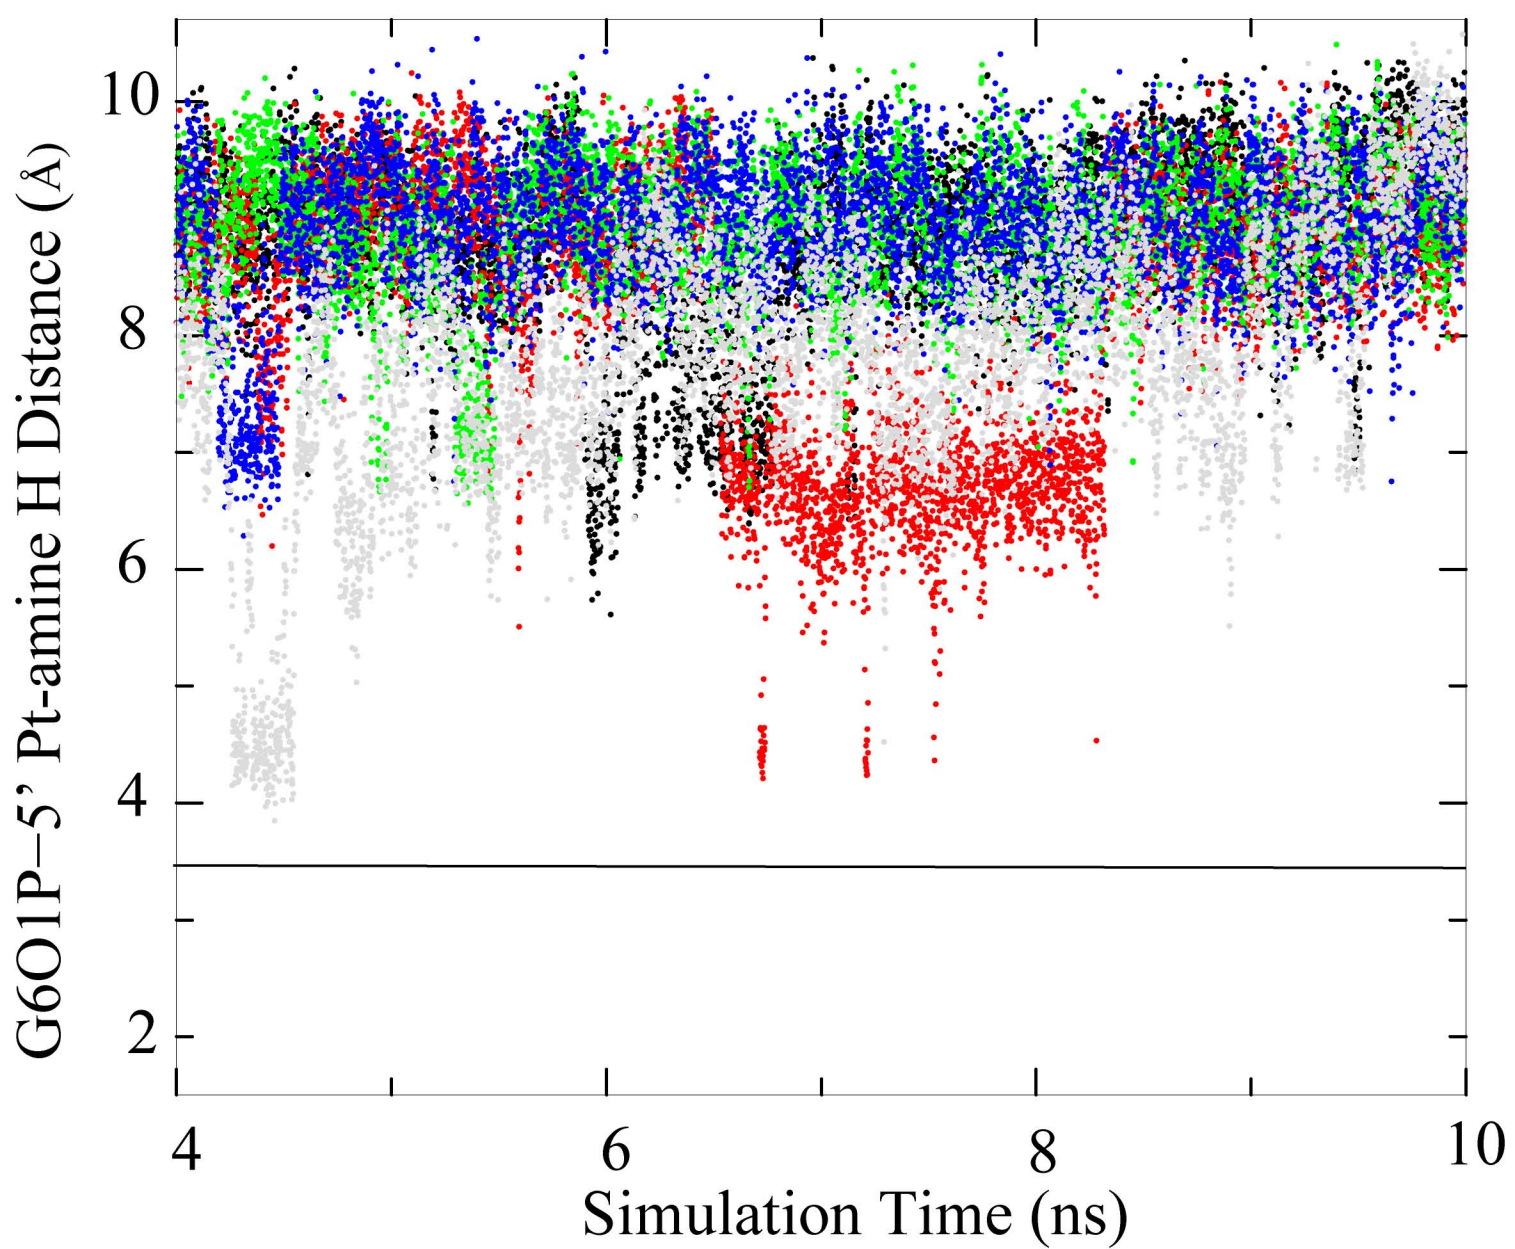

CP-NMR

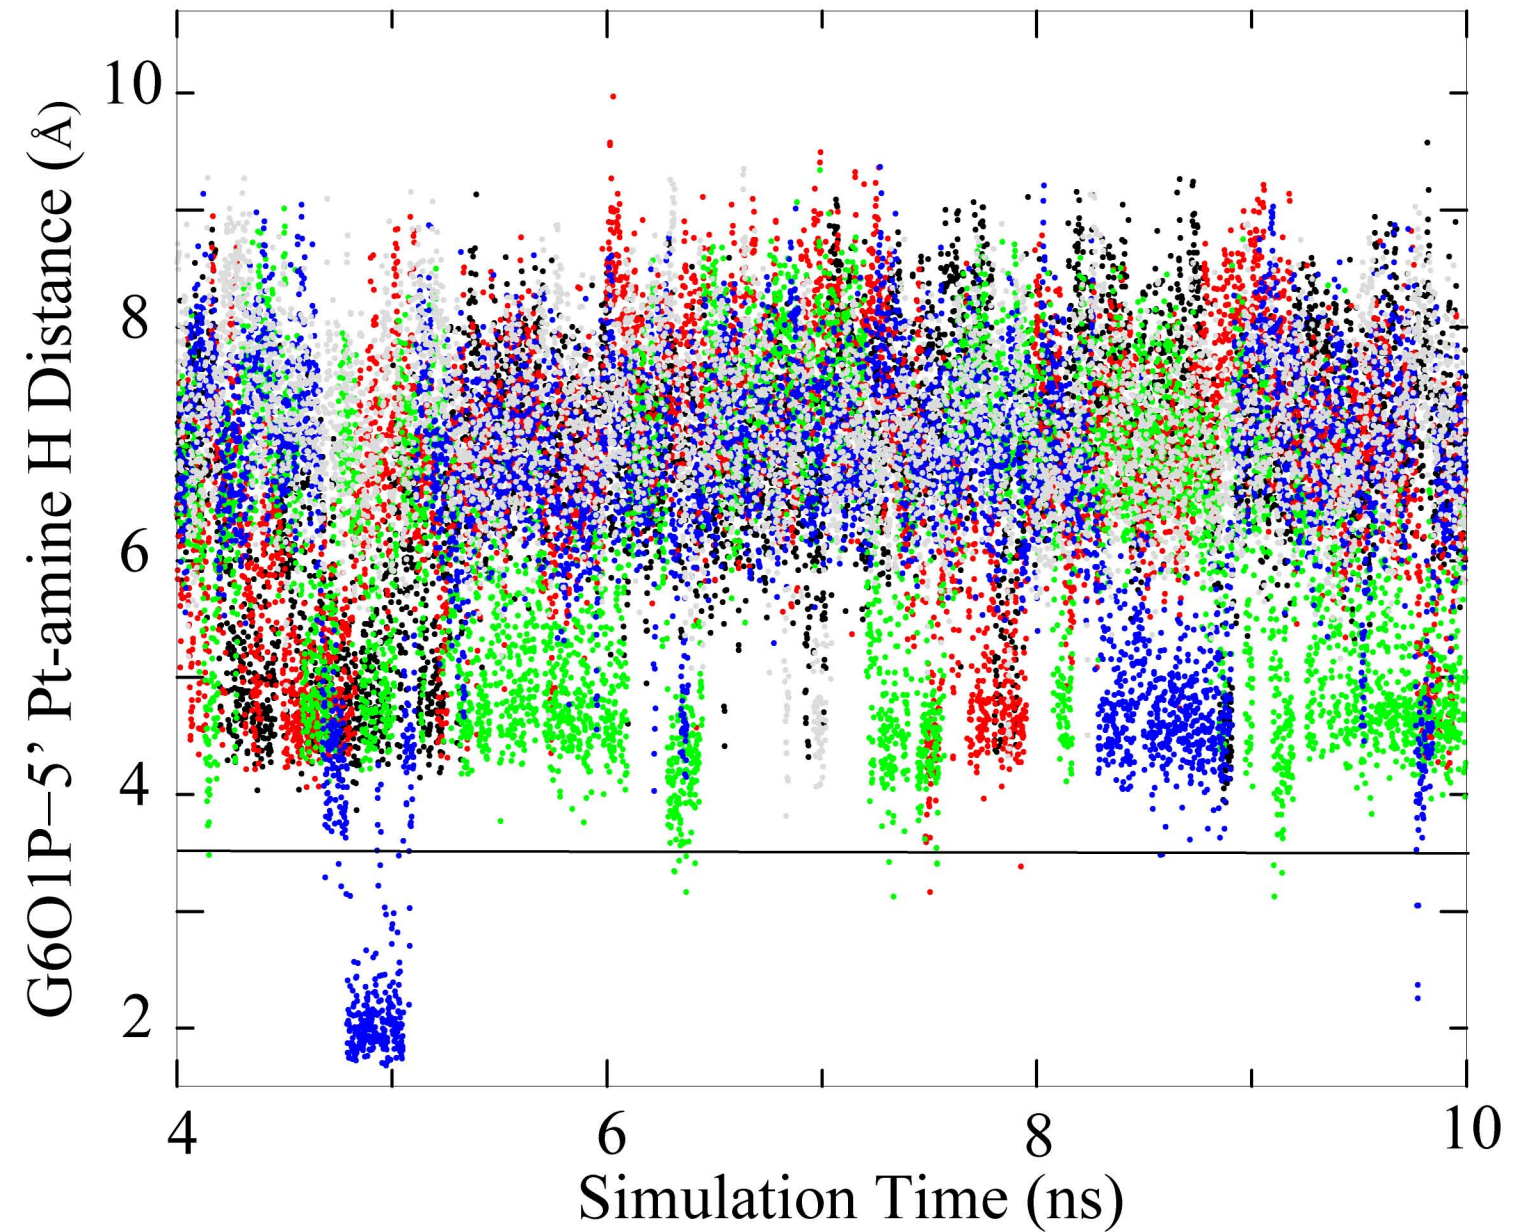

OX-SRY

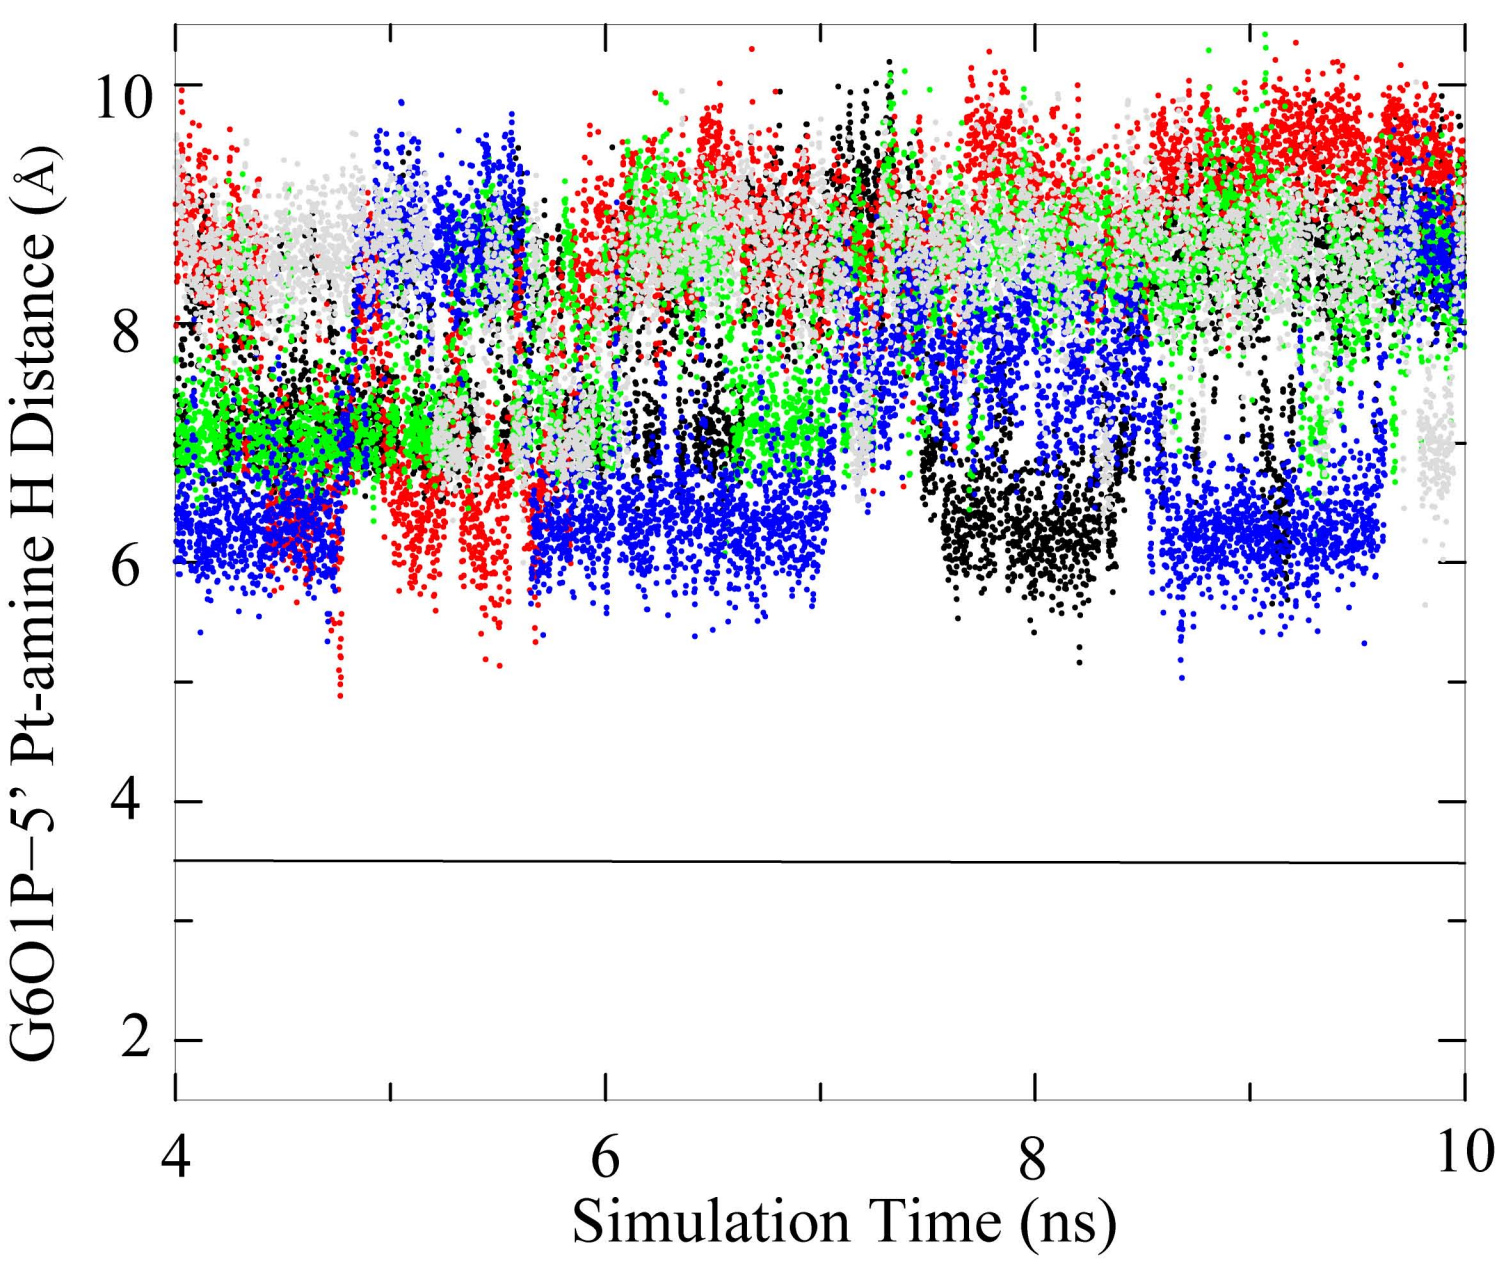

OX-NMR

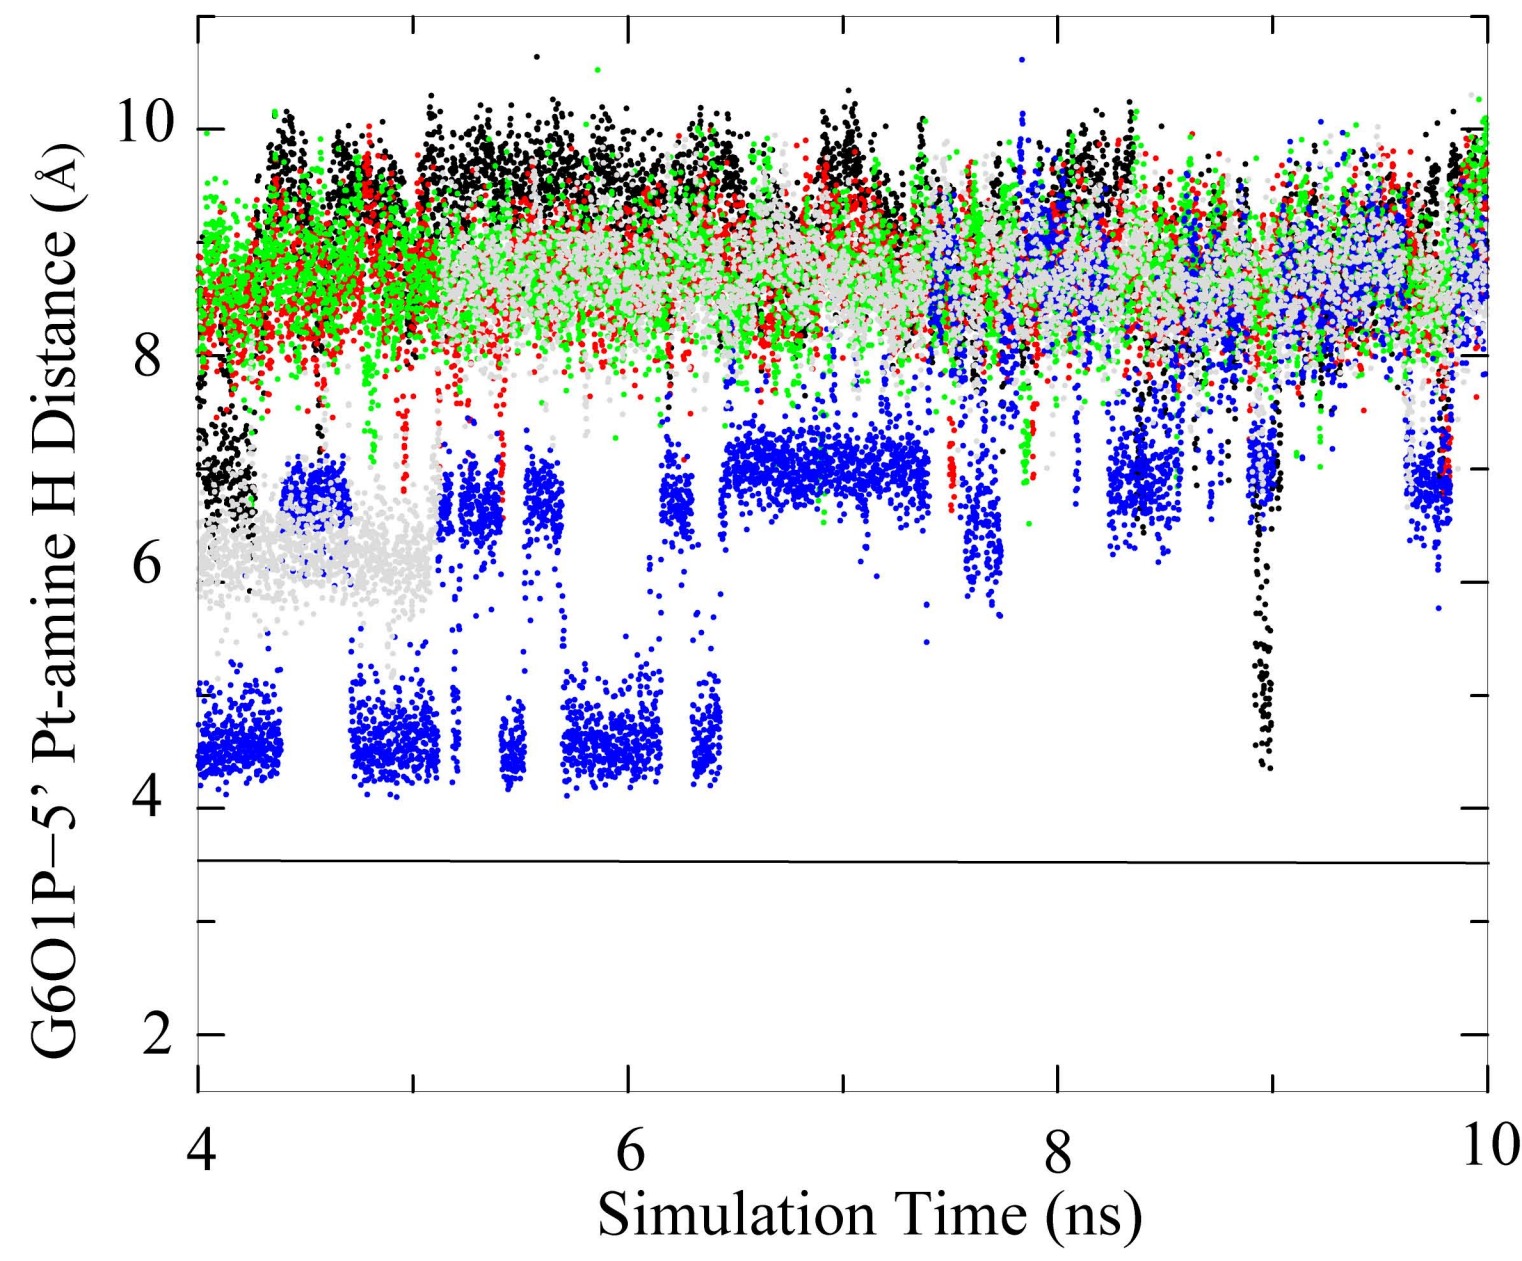

Supplement: NIHMS32970-supplement-04.pdf [file NIHMS32970-supplement-04.pdf]
